# Supplementary material for: Metal triflate formation of C12–C22 phenolic compounds by the simultaneous C–O breaking and C–C coupling of benzyl phenyl ether
Source: Royal Society of Chemistry journal article supplement (doi:10.1039/d1dt02136b), 2021-01-01
Supplement: d1dt02136b1.pdf [file d1dt02136b1.pdf]

## Supplementary Information

### Metal triflates formation of C<sub>12</sub>-C<sub>22</sub> phenolic compounds by simultaneous C-O breaking and C-C coupling of benzyl phenyl ether

Mohammad Shahinur Rahaman<sup>1</sup>, Sarttrawut Tulaphol<sup>2</sup>, Ashten Molley<sup>1</sup>, Kyle Mills<sup>1</sup>, Md Anwar Hossain<sup>1</sup>, Daniel Yelle<sup>3</sup>, Thana Maihom<sup>4</sup>, Noppadon Sathitsuksanoh<sup>1\*</sup>

<sup>1</sup>Department of Chemical Engineering, University of Louisville, Louisville, KY 40292, USA

<sup>2</sup>Sustainable Polymer & Innovative Composite Materials Research Group, Department of Chemistry, Faculty of Science, King Mongkut's University of Technology Thonburi, Bangkok10140, Thailand

<sup>3</sup>USDA, Forest Products Laboratory, Madison, WI, 53726, USA

<sup>4</sup>Department of Chemistry, Faculty of Liberal Arts and Science, Kasetsart University, Kamphaeng Saen Campus, Nakhon Pathom 73140, Thailand

\* Corresponding author: [N.sathitsuksanoh@louisville.edu](mailto:N.sathitsuksanoh@louisville.edu)

| Table of Content                                                                                                       | Page |
|------------------------------------------------------------------------------------------------------------------------|------|
| <b>1. Introduction</b>                                                                                                 |      |
| <b>Table S1.</b> Relative lignin linkage content of hardwood, softwood, and grass and their bond dissociation energies | 2    |
| <b>2. Materials &amp; Method</b>                                                                                       |      |
| <b>Table S2.</b> List of chemicals/reagents used in this study                                                         | 3    |
| <b>3. Results</b>                                                                                                      |      |
| <b>Table S3.</b> Screening of metal triflate catalysts for the reaction of benzyl phenyl ether                         | 4    |
| <b>Figure S1.</b> Gas chromatogram of reaction products and their mass spectra                                         | 5    |
| <b>Table S4.</b> Effect of solvent on the rearrangement of benzyl phenyl ether                                         | 6    |
| Cartesian coordinates of key species                                                                                   | 7    |

**Table S1.** Relative lignin linkage content of hardwood, softwood, and grass and their bond dissociation energies.

| Linkage |       | Percentage of total amount (%) |                       |                    | Bond dissociation energies<br>(kcal/mol) <sup>1</sup> |
|---------|-------|--------------------------------|-----------------------|--------------------|-------------------------------------------------------|
|         |       | Softwood <sup>2</sup>          | Hardwood <sup>2</sup> | Grass <sup>3</sup> |                                                       |
| C-O-C   | β-O-4 | 43-50                          | 50-65                 | 75-84              | 56 - 72                                               |
|         | α-O-4 | 6-8                            | 4-8                   | n.d.               | 48- 57                                                |
|         | 4-O-5 | 4                              | 6-7                   | n.d.               | 78 - 82                                               |
| C-C     | β-β   | 2-4                            | 3-7                   | 1-7                | -                                                     |
|         | β-5   | 9-12                           | 4-6                   | 5-11               | 125- 128                                              |
|         | β-1   | 3-7                            | 5-7                   | n.d.               | 65 - 166                                              |
|         | 5-5   | 10-25                          | 4-10                  | n.d.               | 115 - 118                                             |
| Others  |       | 16                             | 7-8                   | n.d.               | -                                                     |

n.d. = no data

| <b>Table S2. List of chemicals/reagents used in this study</b> |                                                     |                 |                   |
|----------------------------------------------------------------|-----------------------------------------------------|-----------------|-------------------|
| <b>Material/Chemical</b>                                       | <b>Supplier</b>                                     | <b>Purity</b>   | <b>CAS Number</b> |
| Benzyl phenyl ether                                            | Sigma-Aldrich (St. Louis, MO, USA)                  | 98%             | 946-80-5          |
| 2-phenethyl phenyl ether                                       | Frinton Laboratories, Inc. (Hainesport, NJ, USA)    | 99%             | 40515-89-7        |
| Diphenyl ether                                                 | Sigma-Aldrich (St. Louis, MO, USA)                  | 99%             | 101-84-8          |
| n-dodecane                                                     | Beantown Chemical Corporation (Hudson, NH, USA)     | 99%             | 112-40-3          |
| n-heptane                                                      | Beantown Chemical Corporation (Hudson, NH, USA)     | 99%             | 142-82-5          |
| n-octane                                                       | Beantown Chemical Corporation (Hudson, NH, USA)     | 98%             | 111-65-9          |
| Toluene                                                        | The Lab Depot (Dawsonville, GA, USA)                | ACS Grade       | 108-88-3          |
| Dichloromethane                                                | Avantor (Radnor Township, PA, USA)                  | ≥99.5%          | 75-09-2           |
| 2-butanol                                                      | Sigma-Aldrich (St. Louis, MO, USA)                  | 99%             | 4221-99-2         |
| Tetrahydrofuran                                                | Beantown Chemical Corporation (Hudson, NH, USA)     | 99.7%           | 109-99-9          |
| Dimethyl sulfoxide                                             | VWR Chemicals (Radnor, PA, USA)                     | ≥99.9% ACS      | 67-68-5           |
| Methanol                                                       | VWR Chemicals (Radnor, PA, USA)                     | Lab grade       | 67-56-1           |
| Ethanol                                                        | Decon Laboratories, Inc. (King of Prussia, PA, USA) | 200 Proof       | 64-17-5           |
| Acetone                                                        | Aqua Solutions, Inc. (Deer Park, TX, USA)           | Technical grade | 67-64-1           |
| Acetonitrile                                                   | Sigma-Aldrich (St. Louis, MO, USA)                  | 99.8%           | 75-05-8           |
| N, N-dimethylformamide                                         | Chem-Impex Int'l. Inc. (Wood Dale, IL, USA)         | 100%            | 68-12-2           |
| 1,4-dioxane                                                    | Beantown Chemical Corporation (Hudson, NH, USA)     | 99%             | 123-91-1          |
| Ethyl acetate                                                  | Alfa Aesar (Ward Hill, MA, USA)                     | 99%             | 141-78-6          |
| Hf(OTf) <sub>4</sub>                                           | Alfa Aesar (Ward Hill, MA, USA)                     | 98%             | 161337-67-3       |
| Zn(OTf) <sub>2</sub>                                           | Strem Chemical (Newburyport, MA, USA)               | 98%             | 54010-75-2        |
| Sc(OTf) <sub>3</sub>                                           | Sigma-Aldrich (St. Louis, MO, USA)                  | 99%             | 144026-79-9       |
| Y(OTf) <sub>3</sub>                                            | Sigma-Aldrich (St. Louis, MO, USA)                  | 98%             | 52093-30-8        |
| La(OTf) <sub>3</sub>                                           | Strem Chemical (Newburyport, MA, USA)               | 97%             | 52093-26-2        |
| Er(OTf) <sub>3</sub>                                           | Sigma-Aldrich (St. Louis, MO, USA)                  | 98%             | 139177-64-3       |
| Yb(OTf) <sub>3</sub>                                           | Sigma-Aldrich (St. Louis, MO, USA)                  | 99.99%          | 54761-04-5        |
| Al(OTf) <sub>3</sub>                                           | Sigma-Aldrich (St. Louis, MO, USA)                  | 99.9%           | 74974-61-1        |
| Ti(OTf) <sub>3</sub>                                           | Sigma-Aldrich (St. Louis, MO, USA)                  | 98%             | 76262-87-8        |
| Fe(OTf) <sub>3</sub>                                           | Alfa Aesar (Ward Hill, MA, USA)                     | 90%             | 63295-48-7        |

**Table S3.** Screening of metal triflate catalysts for the reaction of benzyl phenyl ether

| Entry | Catalyst             | Time (h)       | Conv. <sup>a</sup> (%) | Selec. <sup>a,b</sup> (%) | Yield <sup>a</sup> (%) |    |    |
|-------|----------------------|----------------|------------------------|---------------------------|------------------------|----|----|
|       |                      |                |                        |                           | B                      | C  | D  |
| 1     | La(OTf) <sub>3</sub> | 1              | 4                      | 75                        | 3                      | 0  | 1  |
| 2     | La(OTf) <sub>3</sub> | 14             | 7                      | 86                        | 6                      | 0  | 1  |
| 3     | Al(OTf) <sub>3</sub> | 1              | 4                      | 81                        | 2                      | 1  | 1  |
| 4     | Al(OTf) <sub>3</sub> | 14             | 11                     | 85                        | 6                      | 3  | 2  |
| 5     | Ti(OTf) <sub>4</sub> | 1              | 6                      | 86                        | 3                      | 2  | 1  |
| 6     | Ti(OTf) <sub>4</sub> | 14             | 16                     | 76                        | 9                      | 3  | 4  |
| 7     | Zn(OTf) <sub>2</sub> | 1              | 6                      | 83                        | 5                      | 0  | 1  |
| 8     | Zn(OTf) <sub>2</sub> | 14             | 10                     | 70                        | 7                      | 0  | 3  |
| 9     | Yb(OTf) <sub>3</sub> | 1              | 14                     | 86                        | 11                     | 1  | 2  |
| 10    | Yb(OTf) <sub>3</sub> | 14             | 43                     | 81                        | 27                     | 8  | 8  |
| 11    | Y(OTf) <sub>3</sub>  | 1              | 15                     | 87                        | 10                     | 3  | 2  |
| 12    | Y(OTf) <sub>3</sub>  | 14             | 16                     | 94                        | 11                     | 4  | 1  |
| 13    | Er(OTf) <sub>3</sub> | 1              | 26                     | 85                        | 15                     | 7  | 3  |
| 14    | Er(OTf) <sub>3</sub> | 14             | 37                     | 81                        | 28                     | 2  | 6  |
| 15    | Sc(OTf) <sub>3</sub> | 1              | 37                     | 86                        | 25                     | 7  | 5  |
| 16    | Sc(OTf) <sub>3</sub> | 14             | 76                     | 78                        | 44                     | 15 | 16 |
| 17    | Fe(OTf) <sub>3</sub> | 1 <sup>c</sup> | 41                     | 84                        | 27                     | 7  | 6  |
| 18    | Fe(OTf) <sub>3</sub> | 1              | 100                    | 84                        | 70                     | 12 | 16 |
| 19    | Hf(OTf) <sub>4</sub> | 1 <sup>c</sup> | 60                     | 81                        | 39                     | 10 | 10 |
| 20    | Hf(OTf) <sub>4</sub> | 1              | 100                    | 89                        | 78                     | 11 | 8  |

Note: *o*- and *p*-benzylphenols (B), di-benzylphenols (C), and phenol (D). Reaction conditions: feed = benzyl phenyl ether 0.26 mmol (feed/heptane/dodecane (internal standard)) = 1:8.5:0.5 by weight), catalyst = 20 mol%, 100°C, 1 bar,<sup>a</sup> Conversion, selectivity, and yield are reported in C-mol%. <sup>b</sup> Selectivity toward benzylphenols (B) and di-benzylphenols (C), as the desired products. <sup>c</sup>Catalyst = 2 mol%

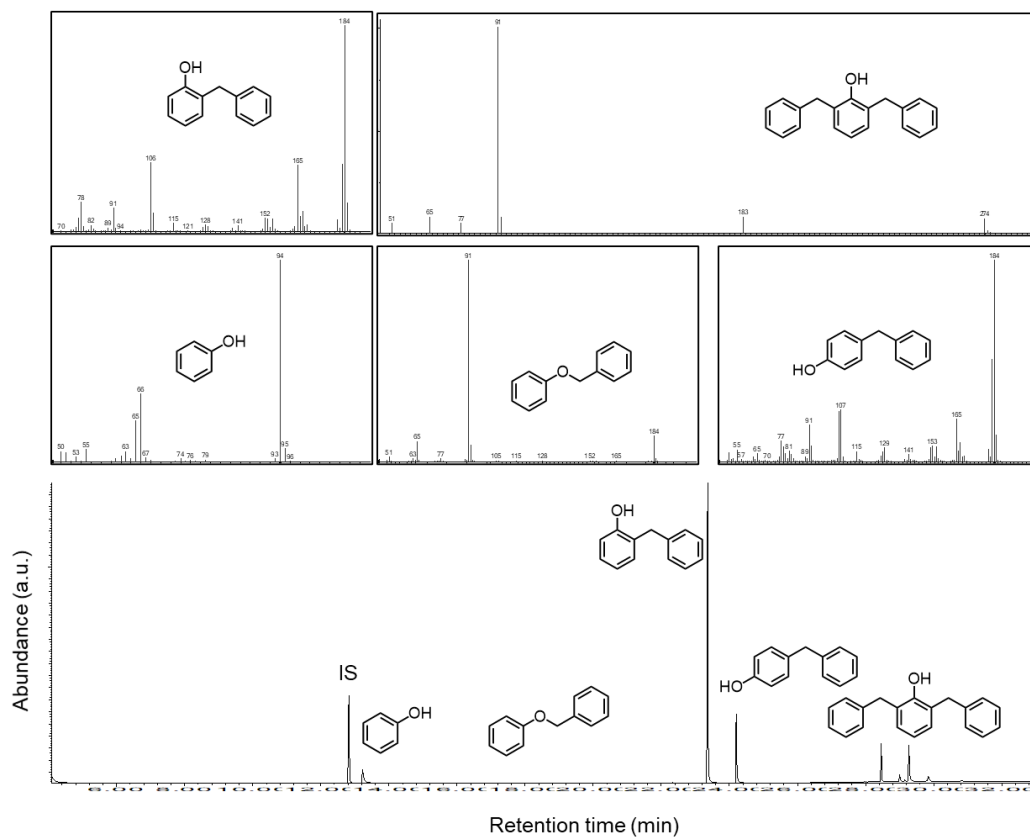

**Figure S1.** Gas chromatogram of reaction products and their mass spectra

**Table S4.** Effect of solvent on the rearrangement of benzyl phenyl ether

| Entry | Solvent            | Polarity index | Conv. <sup>a</sup> (%) | Selec. <sup>a,b</sup> (%) | Yield <sup>a</sup> (%) |    |    |
|-------|--------------------|----------------|------------------------|---------------------------|------------------------|----|----|
|       |                    |                |                        |                           | B                      | C  | D  |
| 1     | n-heptane          | 0              | 100                    | 89                        | 78                     | 11 | 8  |
| 2     | n-octane           | 0.4            | 100                    | 84                        | 75                     | 9  | 3  |
| 3     | toluene            | 2.3            | 100                    | 68                        | 62                     | 6  | 20 |
| 4     | dichloromethane    | 3.4            | 100                    | 77                        | 71                     | 6  | 14 |
| 5     | 2-Butanol          | 3.9            | 4                      | 0                         | 0                      | 0  | 0  |
| 6     | tetrahydrofuran    | 4.2            | 13                     | 9                         | 1                      | 0  | 0  |
| 7     | ethyl acetate      | 4.3            | 3                      | 0                         | 0                      | 0  | 0  |
| 8     | 1,4-dioxane        | 4.8            | 31                     | 7                         | 2                      | 0  | 0  |
| 9     | ethanol            | 5.2            | 7                      | 0                         | 0                      | 0  | 0  |
| 10    | acetone            | 5.4            | 5                      | 0                         | 0                      | 0  | 0  |
| 11    | acetonitrile       | 6.2            | 29                     | 0                         | 0                      | 0  | 0  |
| 12    | dimethyl formamide | 6.4            | 13                     | 0                         | 0                      | 0  | 0  |
| 13    | dimethyl sulfoxide | 6.5            | 9                      | 0                         | 0                      | 0  | 0  |
| 14    | methanol           | 6.6            | 10                     | 0                         | 0                      | 0  | 0  |

Reaction conditions: feed = benzyl phenyl ether 0.26 mmol (feed/solvent/dodecane (internal standard)) = 1:8.5:0.5 by weight), Hf(OTf)<sub>4</sub> = 20 mol%, 100°C, 1 bar, 1h.

<sup>a</sup>Conversion, selectivity and yield were reported in C-mol%. <sup>b</sup>Selectivity toward benzylphenols (B) and di-benzylphenols (C), as the desired products.

## Cartesian coordinates of key species

### 1. Benzyl phenyl ether

|   |           |           |           |
|---|-----------|-----------|-----------|
| C | -0.452269 | -0.148861 | 0.442969  |
| C | 0.842532  | -0.649265 | 0.335545  |
| C | 1.847495  | 0.166181  | -0.174258 |
| C | 1.552239  | 1.471227  | -0.569012 |
| C | 0.262232  | 1.952450  | -0.455005 |
| C | -0.751966 | 1.144224  | 0.052000  |
| H | -1.229879 | -0.788767 | 0.840128  |
| H | 1.048927  | -1.661619 | 0.650244  |
| H | 2.352542  | 2.085957  | -0.959395 |
| H | 0.044169  | 2.966683  | -0.764024 |
| H | -1.761101 | 1.522943  | 0.140235  |
| O | 3.142539  | -0.216889 | -0.322728 |
| C | 3.490626  | -1.533962 | 0.045915  |
| H | 2.885430  | -2.247782 | -0.526125 |
| H | 3.282953  | -1.696109 | 1.108908  |
| C | 4.950873  | -1.764614 | -0.232588 |
| C | 5.619328  | -2.775056 | 0.451736  |
| C | 5.636874  | -1.020362 | -1.185024 |
| C | 6.953030  | -3.045308 | 0.183983  |
| H | 5.092638  | -3.351673 | 1.203917  |
| C | 6.974167  | -1.286523 | -1.448729 |
| H | 5.122498  | -0.228427 | -1.711904 |
| C | 7.635071  | -2.299643 | -0.768637 |
| H | 7.462200  | -3.832552 | 0.724794  |
| H | 7.501267  | -0.698402 | -2.189045 |
| H | 8.677372  | -2.504527 | -0.975490 |

### 2. *o*-benzylphenols

|   |           |           |           |
|---|-----------|-----------|-----------|
| C | -0.058186 | 0.559151  | 0.064134  |
| C | 1.109886  | -0.141252 | 0.324175  |
| C | 2.365061  | 0.441092  | 0.119910  |
| C | 2.406374  | 1.744537  | -0.354592 |
| C | 1.241937  | 2.458131  | -0.620849 |
| C | 0.009819  | 1.862835  | -0.410165 |
| H | -1.017998 | 0.083640  | 0.233211  |
| H | 3.369279  | 2.211937  | -0.518817 |
| H | 1.303061  | 3.472913  | -0.990142 |
| H | -0.904087 | 2.406050  | -0.612188 |
| C | 3.595391  | -0.386141 | 0.427729  |
| H | 3.563364  | -1.292894 | -0.181939 |
| H | 3.530212  | -0.726063 | 1.464561  |
| C | 4.896368  | 0.334581  | 0.206281  |
| C | 5.458932  | 1.108573  | 1.217694  |
| C | 5.542554  | 0.275810  | -1.025081 |

|   |          |           |           |
|---|----------|-----------|-----------|
| C | 6.639581 | 1.806849  | 1.006011  |
| H | 4.962278 | 1.164683  | 2.179801  |
| C | 6.723976 | 0.972025  | -1.242481 |
| H | 5.112664 | -0.321338 | -1.821280 |
| C | 7.275885 | 1.740602  | -0.226580 |
| H | 7.064534 | 2.401454  | 1.804617  |
| H | 7.215006 | 0.912398  | -2.205412 |
| H | 8.197900 | 2.282278  | -0.393095 |
| O | 1.099646 | -1.423703 | 0.788986  |
| H | 0.191164 | -1.724366 | 0.893106  |

### 3. di-benzylphenols

|   |           |           |           |
|---|-----------|-----------|-----------|
| O | 0.035500  | -0.261822 | -1.647065 |
| C | -1.218051 | -1.829853 | -0.429863 |
| C | 1.215248  | -1.896037 | -0.320171 |
| C | -2.468940 | -1.149932 | -0.926054 |
| C | 2.550224  | -1.340127 | -0.745989 |
| C | 0.031320  | -1.322269 | -0.790069 |
| C | -2.733113 | 0.157368  | -0.208531 |
| C | 2.777781  | 0.108732  | -0.356486 |
| C | -1.266131 | -2.933201 | 0.412615  |
| C | 1.124786  | -2.987680 | 0.536897  |
| C | -0.104684 | -3.513027 | 0.903002  |
| C | -2.698835 | 1.370942  | -0.885312 |
| C | -3.011276 | 0.161082  | 1.156603  |
| C | 2.335616  | 0.598697  | 0.871379  |
| C | 3.437074  | 0.976825  | -1.223931 |
| C | -2.943316 | 2.563995  | -0.216752 |
| C | -3.257316 | 1.348869  | 1.828386  |
| C | 2.559633  | 1.920488  | 1.226834  |
| C | 3.662129  | 2.301292  | -0.870479 |
| C | -3.224292 | 2.556650  | 1.141809  |
| C | 3.225022  | 2.775843  | 0.357605  |
| H | -3.315235 | -1.822726 | -0.773199 |
| H | -2.388987 | -0.958957 | -1.996680 |
| H | 2.657254  | -1.429340 | -1.831233 |
| H | 3.338958  | -1.955383 | -0.307487 |
| H | -2.233170 | -3.337309 | 0.689302  |
| H | 2.038793  | -3.433864 | 0.911047  |
| H | -0.157378 | -4.368914 | 1.562347  |
| H | -2.467694 | 1.379207  | -1.943675 |
| H | -3.029892 | -0.779323 | 1.696664  |
| H | 1.802319  | -0.060885 | 1.545966  |
| H | 3.776584  | 0.610434  | -2.186319 |
| H | 0.864388  | 0.228615  | -1.577729 |
| H | -2.911195 | 3.500590  | -0.758881 |
| H | -3.475626 | 1.333441  | 2.888702  |
| H | 2.207281  | 2.285810  | 2.182773  |



|   |           |          |           |
|---|-----------|----------|-----------|
| H | 4.174675  | 2.961968 | -1.557776 |
| H | -3.415396 | 3.485214 | 1.664016  |
| H | 3.394244  | 3.808386 | 0.633632  |

#### 4. Phenol

|   |           |           |           |
|---|-----------|-----------|-----------|
| C | -0.571081 | -0.278265 | 0.135869  |
| C | 0.789499  | -0.546228 | 0.073059  |
| C | 1.694711  | 0.505084  | 0.032002  |
| C | 1.248297  | 1.818899  | 0.063072  |
| C | -0.113665 | 2.079570  | 0.125981  |
| C | -1.026366 | 1.033450  | 0.159893  |
| H | -1.276917 | -1.098264 | 0.168436  |
| H | 1.163807  | -1.561689 | 0.063700  |
| H | 1.974972  | 2.620766  | 0.045799  |
| H | -0.461782 | 3.104195  | 0.150736  |
| H | -2.087238 | 1.239512  | 0.210765  |
| O | 3.050775  | 0.241991  | 0.019630  |
| H | 3.359655  | 0.176318  | -0.889796 |

#### References

1. R. Parthasarathi, R. A. Romero, A. Redondo and S. Gnanakaran, *J. Phys. Chem. Lett.*, 2011, **2**, 2660-2666.
2. P. C. Rodrigues Pinto, E. A. Borges da Silva and A. E. Rodrigues, *Ind. Eng. Chem. Res.*, 2011, **50**, 741-748.
3. Q. Mei, X. Shen, H. Liu and B. Han, *Chin. Chem. Lett.*, 2019, **30**, 15-24.
